# Supplementary material for: Selective catalytic reduction of NO with NH3 over Cu-exchanged CHA, GME, and AFX zeolites: a density functional theory study
Source: Royal Society of Chemistry journal article supplement (doi:10.1039/d0cy02342f), 2021-01-01
Supplement: d0cy02342f1.pdf [file d0cy02342f1.pdf]

## Supporting Information for

### Selective Catalytic Reduction of NO with NH<sub>3</sub> over Cu-Exchanged CHA, GME, and AFX Zeolites: A Density Functional Theory Study

Pei Zhao,<sup>a,b\*</sup> Bundet Boekfa,<sup>c</sup> Ken-ichi Shimizu,<sup>b,d</sup> Masaru Ogura,<sup>b,e</sup> and Masahiro Ehara<sup>a,b\*</sup>

<sup>a</sup>*Research Center for Computational Science, Institute for Molecular Science, Okazaki, 444-8585, Japan.*

<sup>b</sup>*Element Strategy Initiative for Catalysts and Batteries (ESICB), Kyoto University, Kyoto 615-8245, Japan.*

<sup>c</sup>*Department of Chemistry, Faculty of Liberal Arts and Science, Kasetsart University, Kamphaengsaen Campus, Nakhonpathom 73140, Thailand.*

<sup>d</sup>*Institute for Catalysis, Hokkaido University, Sapporo 001-0021, Japan*

<sup>e</sup>*Institute of Industrial Science, The University of Tokyo, Tokyo 153-8505, Japan*

## Contents

- I. **Figure S1.** The computational models of *cha* (42T), *gme* (36T) and *aft* (54T).
- II. **Scheme S1.** The reaction mechanism for the SCR reaction in the Cu-zeolite.
- III. **Figure S2.** Reaction energy diagrams and optimized structures of intermediates and transition states for reduction by NO and NH<sub>3</sub> on Cu<sup>II</sup>OH-Al-*cha* and Cu<sup>II</sup>OH-Al-*aft*.
- IV. **Figure S3.** Reaction energy diagrams and optimized structures of intermediates and transition states for reduction by NO and NH<sub>3</sub> on Cu<sup>II</sup>-2Al-*gme* and -*aft*.
- V. **Table S1.** Deformation energies of intermediates and transition states with respect to the pristine structures of Cu<sup>II</sup>-2Al-*cha*, -*gme*, and -*aft*.
- VI. **Figure S4.** Reaction energy diagrams and local structures of intermediates and transition states for oxidation by Cu<sup>I</sup>-2AlH-*cha*, -*gme*, and -*aft*.
- VII. **Figure S5.** Local geometries of the INT1, TS1, INT2, TS2 and INT3 of *cha*, *gme*, and *aft* at the 2Al site.
- VIII. **Figure S6.** Local geometries of the TS3, INT5, and INT6 of *cha*, *gme*, and *aft* at the Al site.
- IX. **Table S2.** Deformation energies of intermediates and transition states for the oxidation with respect to the pristine structures of Cu<sup>I</sup>-Al-*cha*, -*gme*, and -*aft*.
- X. **Table S3.** Deformation energies of intermediates and transition states for the oxidation with respect to the pristine structures of Cu<sup>I</sup>-2AlH-*cha*, -*gme*, and -*aft*.
- XI. **Figure S7.** Optimized structures and relative energies of INT1, INT2, and INT4 for the *gme* cage.
- XII. **Figure S8.** Optimized structures and relative energies of INT1, INT2, and INT4 for the *aft* cage.
- XIII. **Table S4.** Interaction energies between the [zeolite]<sup>2-</sup> cage and the inner 2[Cu<sup>I</sup>(NH<sub>3</sub>)<sub>2</sub>]<sup>+</sup>/2[OCu<sup>I</sup>(NH<sub>3</sub>)<sub>2</sub>]<sup>+</sup> ion in INT1 and INT4 as well as relative energies of the outer cage and the inner ion for *cha* and *aft*.
- XIV. **Figure S9.** Local geometries of intermediates and transition states for the O<sub>2</sub> activation by the 2[NH<sub>3</sub>-Cu<sup>I</sup>-NH<sub>3</sub>] dimer in 2Al -*gme*, and -*aft*.
- XV. **Figure S10.** Potential energy surface between INT2 and INT3 for the O<sub>2</sub> activation by the 2[NH<sub>3</sub>-Cu<sup>I</sup>-NH<sub>3</sub>] dimer in 2Al-*cha*.

- XVI. Natural electron configuration of Cu in Cu-*cha*, Cu-*gme*, and Cu-*aft*.
- XVII. NPA charge of Cu in Cu-*cha*, Cu-*gme*, and Cu-*aft*.

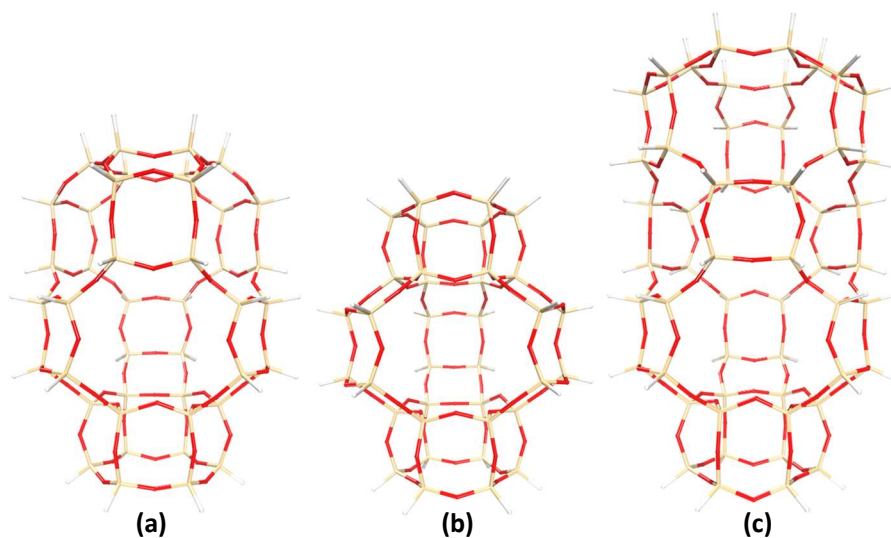

**I. Figure S1.** The computational models of *cha* (42T, a), *gme* (36T, b) and *aft* (54T, c). (Color code: Si tan; O red; H white.)

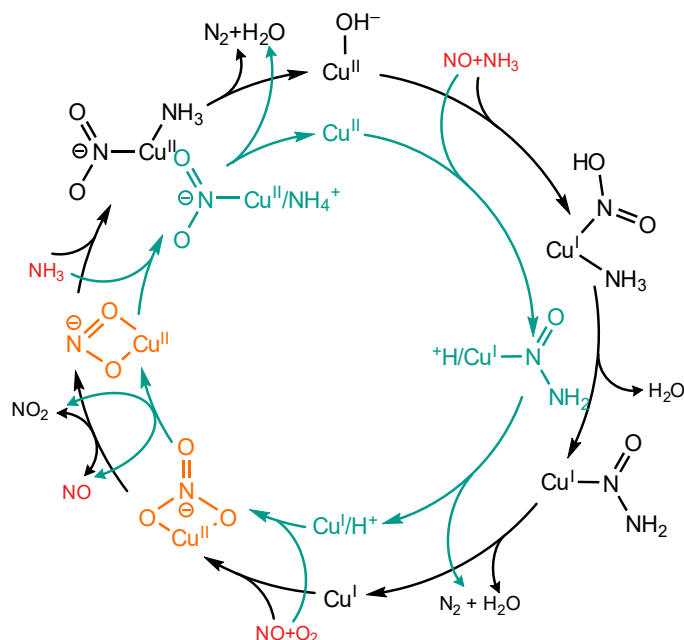

**II. Scheme S1.** The reaction mechanism for the SCR reaction in the Cu-zeolite. The reaction pathways for the oxidation of  $\text{Cu}^{\text{I}}$  and the reduction of  $\text{Cu}^{\text{II}}$  with one Al atom in the framework cages are represented in black (adapted from Janssens et al.<sup>13</sup>), while that with two Al atoms in the frameworks are represented in green (adapted from Schneider et al.<sup>12</sup>). The same intermediates on 1Al and 2Al sites are indicated in orange. Reactants and products are colored in red and black, respectively.

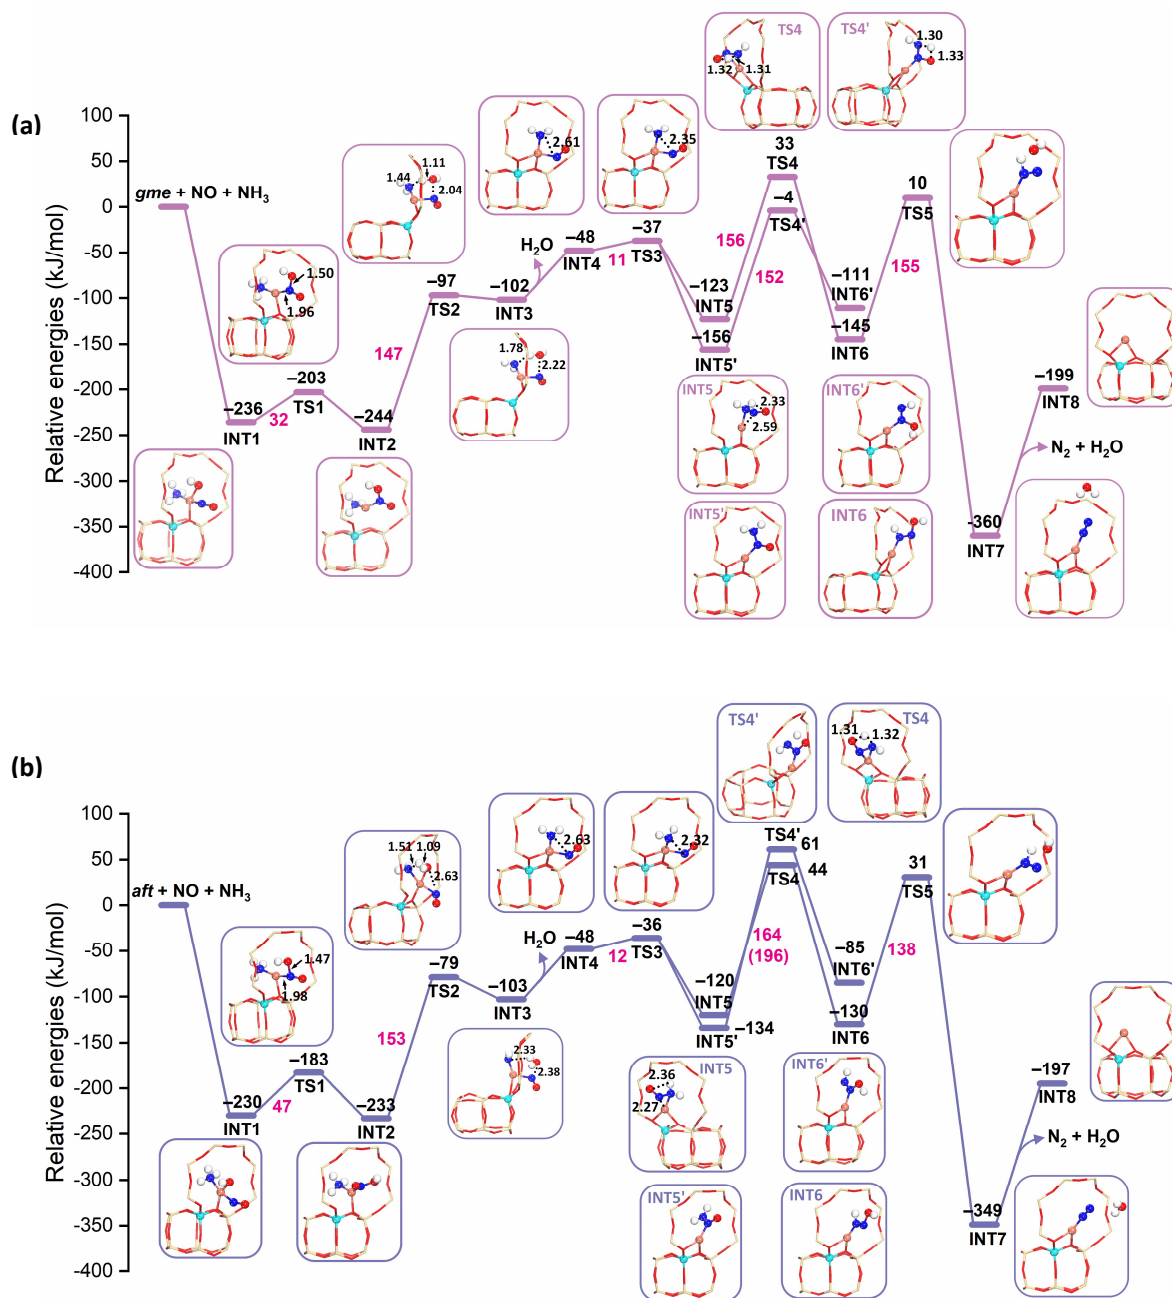

III. **Figure S2.** Reaction energy diagrams and optimized structures of intermediates and transition states for reduction by NO and NH<sub>3</sub> on Cu<sup>II</sup>OH-Al-*gme* (a) and -*aft* (b). Values of reaction energies and energy barriers are shown in black and magenta, respectively. (The value in parenthesis for *aft* is the energy barrier between INT5' and INT6'.)

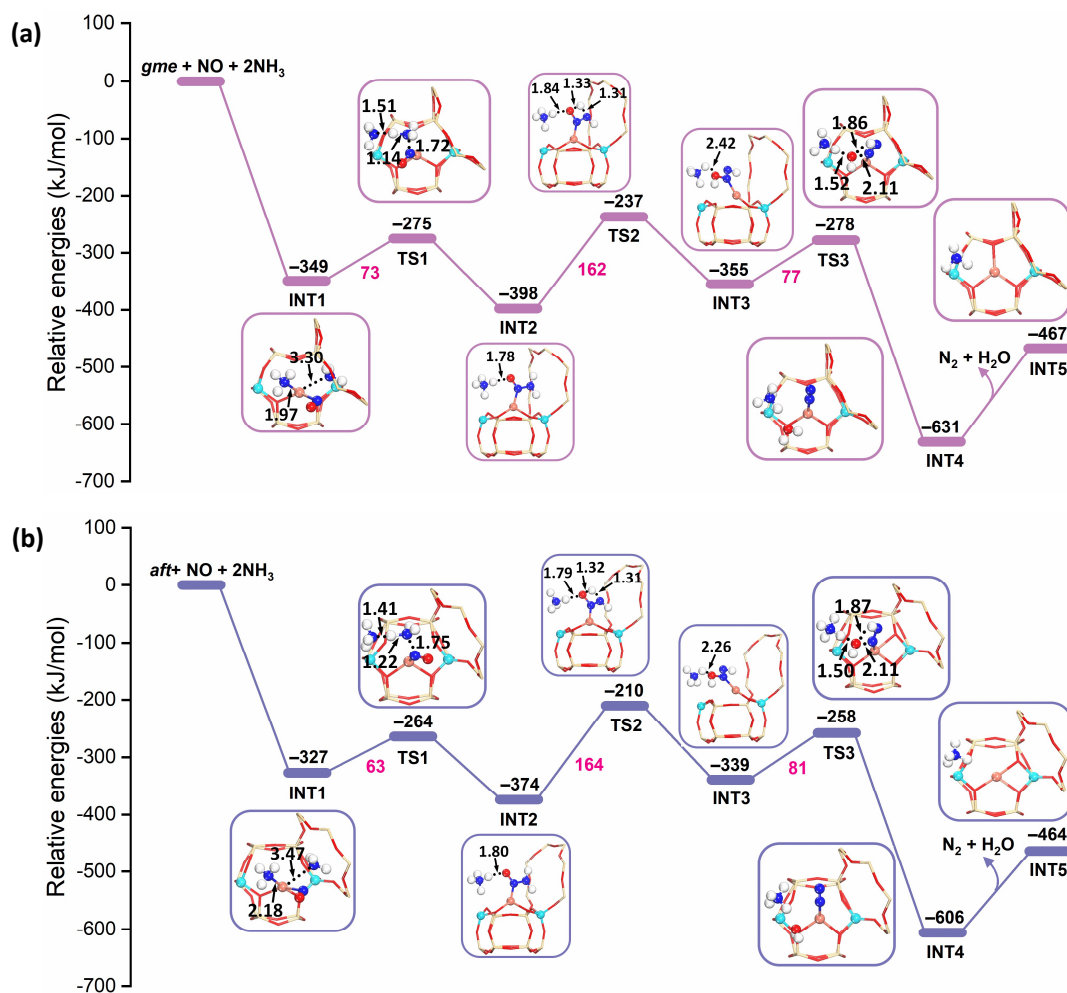

IV. **Figure S3.** Reaction energy diagrams and optimized structures of intermediates and transition states for reduction by NO and NH<sub>3</sub> on Cu<sup>II</sup>-2Al-*gme* (a) and -*aft* (b).

V. **Table S1.** Deformation energies (kJ/mol) of intermediates and transition states with respect to the pristine structures of Cu<sup>II</sup>-2Al-*cha*, -*gme*, and -*aft*.

| Cage       | INT1 | TS1 | INT2 |
|------------|------|-----|------|
| <i>cha</i> | 511  | 390 | 524  |
| <i>gme</i> | 520  | 412 | 547  |
| <i>aft</i> | 498  | 395 | 474  |

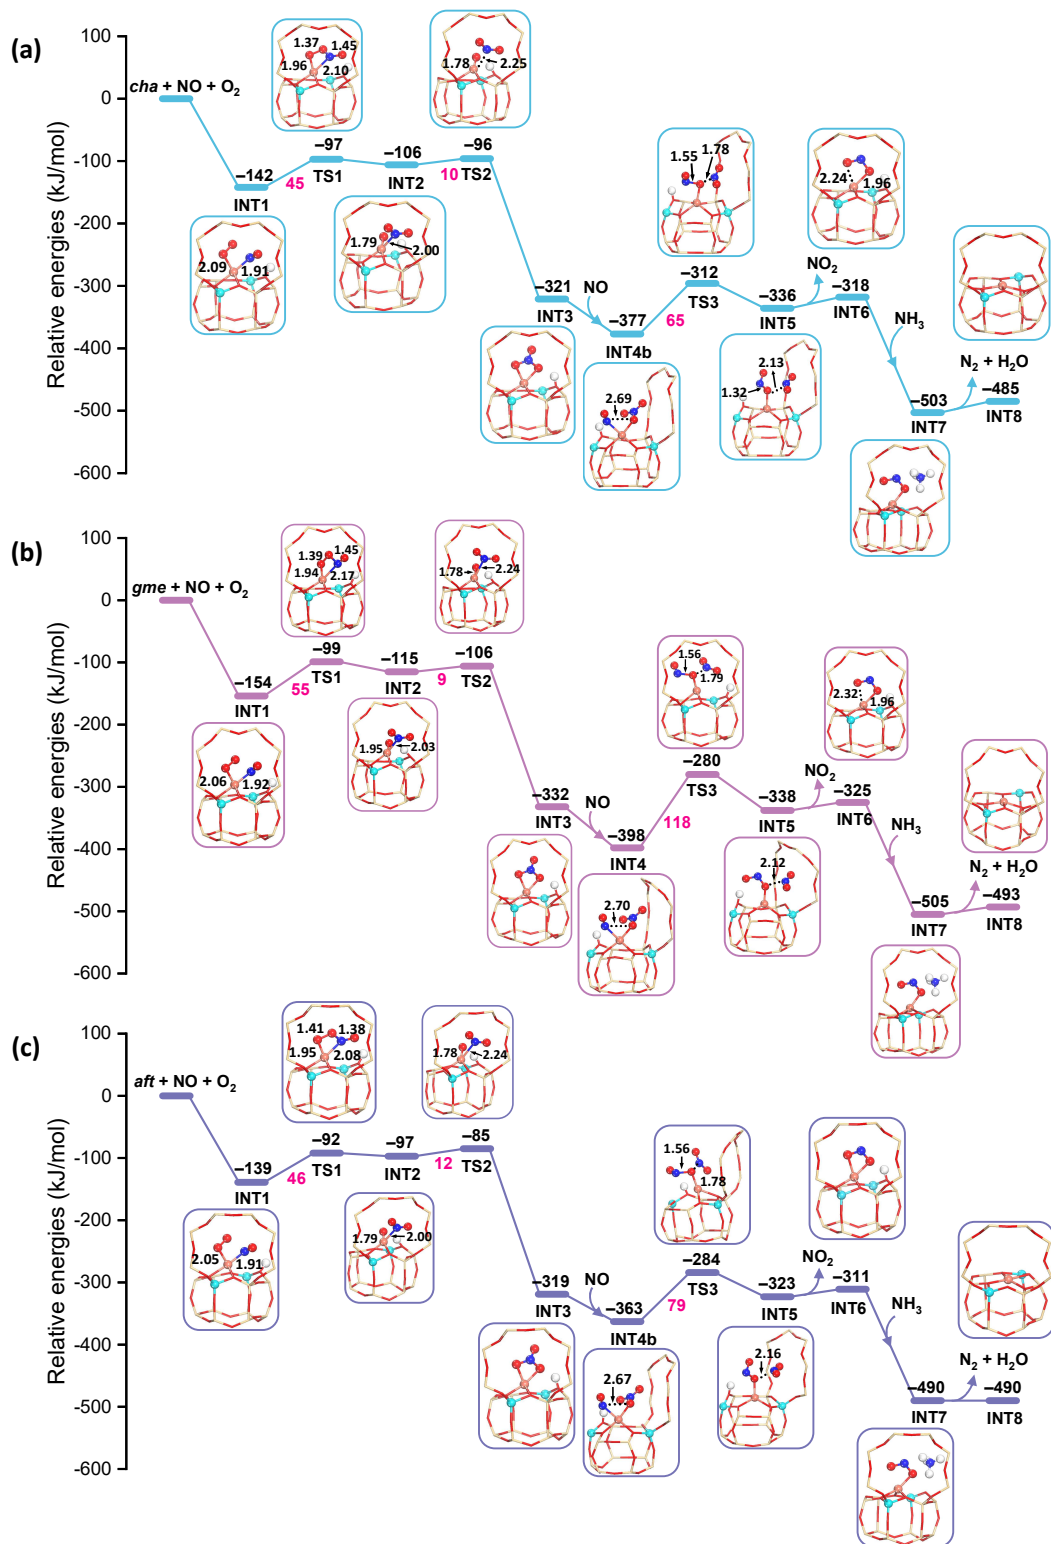

**VI. Figure S4.** Reaction energy diagrams and local structures of intermediates and transition states for oxidation by Cu<sup>I</sup>-2AlH-*cha* (a), -*gme* (b), and -*aft* (c). Values of reaction energies and energy barriers are shown in black and magenta, respectively.

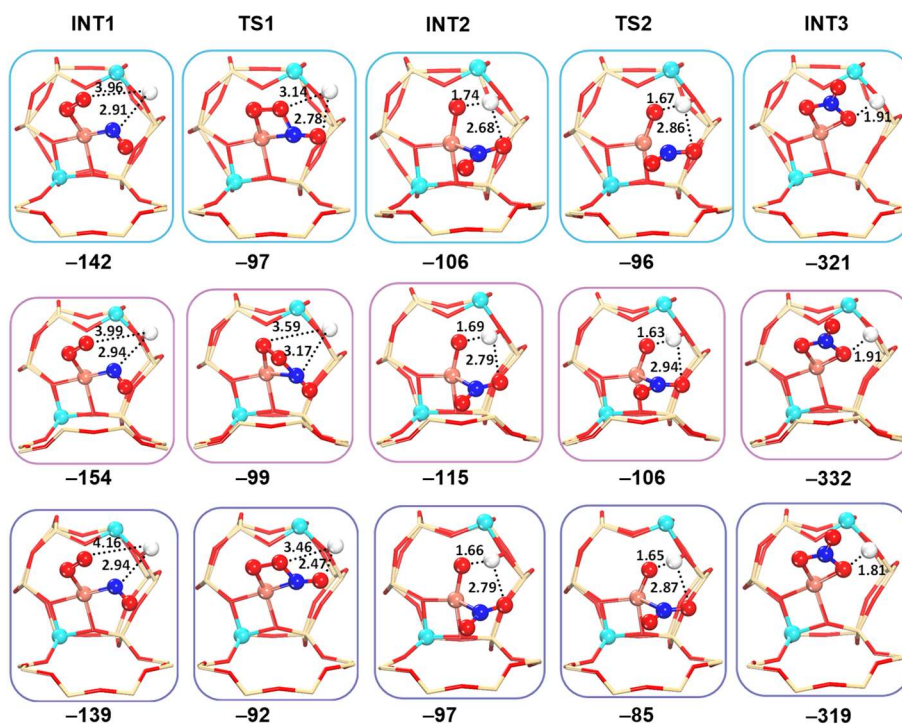

**VII. Figure S5.** Local geometries of the INT1, TS1, INT2, TS2 and INT3 of *cha* (blue), *gme* (pink), - and *aft* (purple) at the 2Al site. The distances between the adsorbed molecules and the Brønsted proton are shown in angstrom. The values beneath each structure are adsorption energies or reaction energies with respect to the isolated reactants.



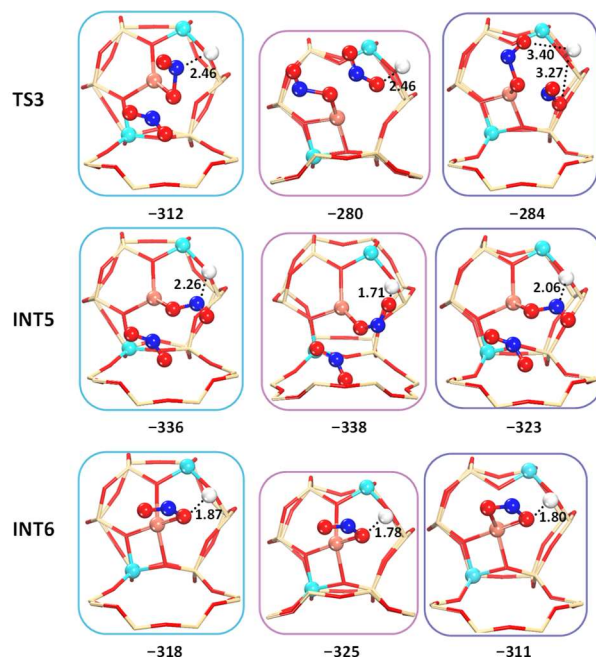

**VIII. Figure S6.** Local geometries of the TS3, INT5, and INT6 of *cha* (blue), *gme* (pink), and *aft* (purple) at the Al site. The distances between the adsorbed molecules and the Brønsted proton are shown in angstrom. The values beneath each structure are reaction energies with respect to the isolated reactants.

**IX. Table S2.** Deformation energies (kJ/mol) of intermediates and transition states for the oxidation with respect to the pristine structures of  $\text{Cu}^{\text{I}}\text{-Al-cha}$ , *-gme*, and *-aft*.

| Cages | INT1 | TS1 | INT2 | TS2 | INT3 | INT4 | TS3 | INT5 | INT6 | INT7 |
|-------|------|-----|------|-----|------|------|-----|------|------|------|
| CHA   | 83   | 86  | 91   | 90  | 92   | 93   | 74  | 72   | 90   | 91   |
| GME   | 85   | 90  | 95   | 92  | 93   | 98   | 89  | 67   | 88   | 88   |
| AFT   | 73   | 79  | 86   | 83  | 84   | 84   | 72  | 74   | 83   | 87   |

**X. Table S3.** Deformation energies (kJ/mol) of intermediates and transition states for the oxidation with respect to the pristine structures of  $\text{Cu}^{\text{I}}\text{-2AlH-cha}$ , *-gme*, and *-aft*.

| Cages      | INT1 | TS1 | INT2 | TS2 |
|------------|------|-----|------|-----|
| <i>cha</i> | 77   | 83  | 147  | 136 |
| <i>gme</i> | 84   | 89  | 150  | 144 |
| <i>aft</i> | 83   | 90  | 163  | 148 |

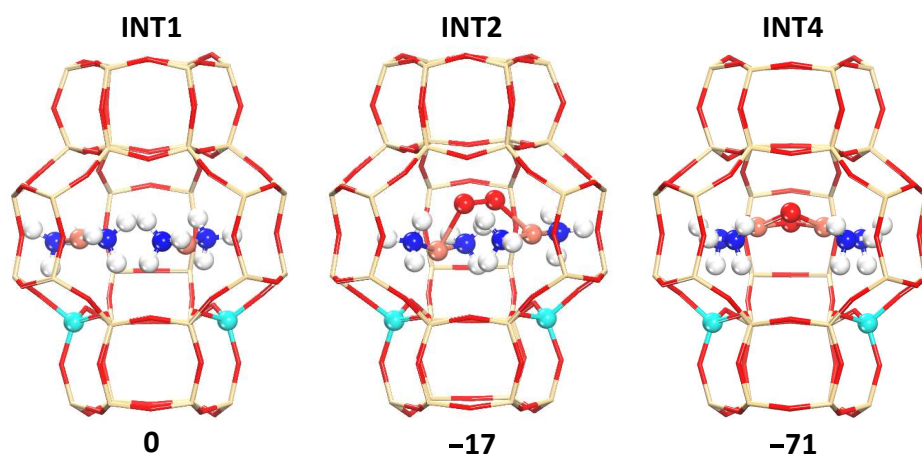

**XI. Figure S7.** Optimized structures and relative energies (kJ/mol) of INT1, INT2, and INT4 for the *gme* cage. The energies of INT2 and INT4 are obtained with respect to INT1 and O<sub>2</sub>.

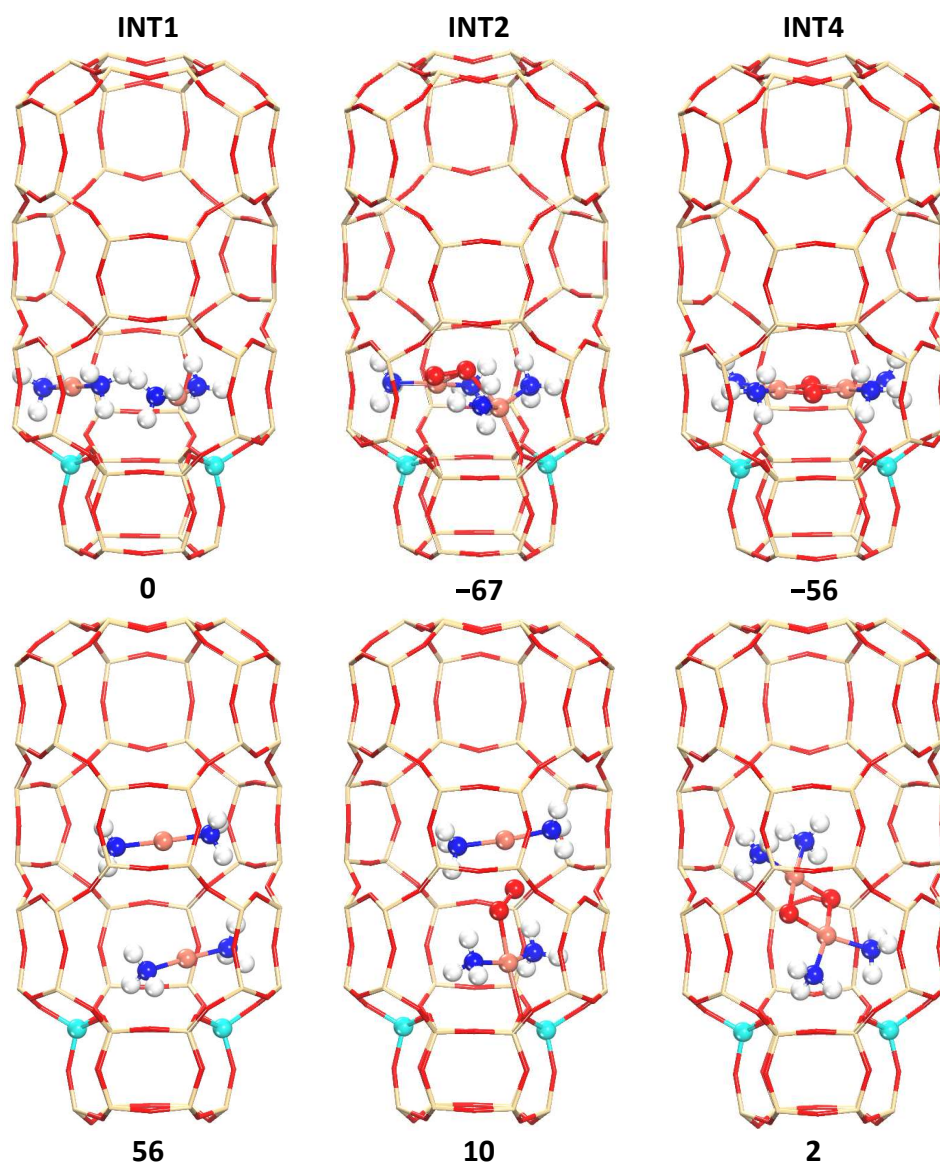

**XII. Figure S8.** Optimized structures and relative energies (kJ/mol) of INT1, INT2, and INT4 for the *aft* cage (top: para-site; bottom: per-site). The energies of INT2 and INT4 are obtained with respect to the para-site INT1 and O<sub>2</sub>.

**XIII. Table S4.** Interaction energies ( $\Delta E_{\text{int}}$ , in kJ/mol) between the [zeolite]<sup>2-</sup> cage and the inner  $2[\text{Cu}^{\text{I}}(\text{NH}_3)_2]^+/2[\text{OCu}^{\text{I}}(\text{NH}_3)_2]^+$  ion in INT1 and INT4 as well as relative energies of the outer cage ( $\Delta E_{\text{cage}}$ ) and the inner species ( $\Delta E_{\text{Cu}}$ ) for *cha* and *aft*.

|            |      | INT1                    |                          |                        | INT4                    |                          |                        |
|------------|------|-------------------------|--------------------------|------------------------|-------------------------|--------------------------|------------------------|
|            |      | $\Delta E_{\text{int}}$ | $\Delta E_{\text{cage}}$ | $\Delta E_{\text{Cu}}$ | $\Delta E_{\text{int}}$ | $\Delta E_{\text{cage}}$ | $\Delta E_{\text{Cu}}$ |
| <i>cha</i> | para | -1068                   | 11                       | 68                     | -1118                   | 12                       | 50                     |
|            | per  | -937                    | 0                        | 0                      | -1015                   | 0                        | 0                      |
| <i>aft</i> | para | -976                    | 11                       | 49                     | -1037                   | 16                       | 56                     |
|            | per  | -860                    | 0                        | 0                      | -908                    | 0                        | 0                      |
| <i>gme</i> | para | -1141                   | /                        | /                      | -1212                   | /                        | /                      |

$$\Delta E_{\text{int}} = E_{\text{INT/TS}} - (E_{\text{cage}} + E_{\text{Cu}})$$

$E_{\text{cage}}$  and  $E_{\text{Cu}}$  are single point energies of the outer cage and the inner species of INT/TS.

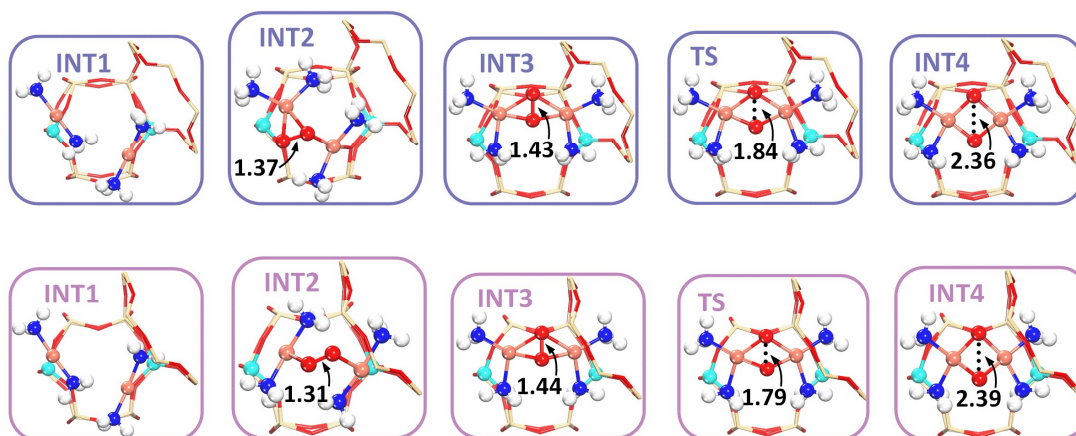

**XIV. Figure S9.** Local geometries of intermediates and transition states for the  $\text{O}_2$  activation by the  $2[\text{NH}_3\text{-Cu}^{\text{I}}\text{-NH}_3]$  dimer in 2Al-*gme* (pink), and -*aft* (purple).

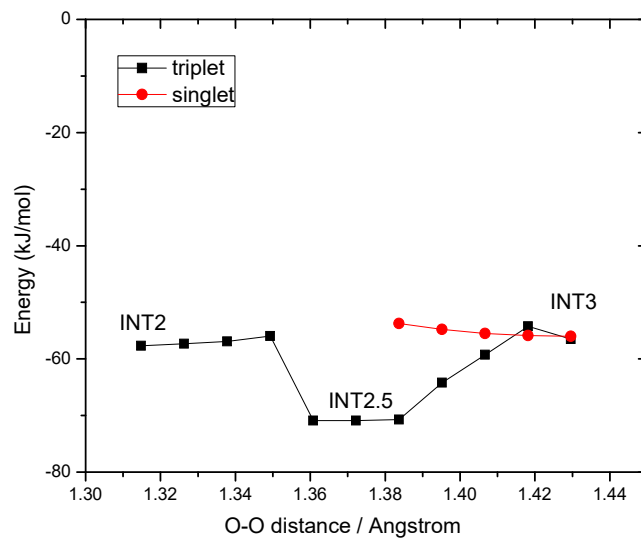

**XV. Figure S10.** Potential energy surface between INT2 and INT3 for the O<sub>2</sub> activation by the 2[NH<sub>3</sub>-Cu<sup>I</sup>-NH<sub>3</sub>] dimer in 2Al-*cha*. Partial optimization was conducted with O-O distance being fixed and all the other coordinates optimized.

# XVI. Natural electron configurations of Cu in Cu-*cha*, Cu-*gme*, and Cu-*aft*.

**Table S5.** Natural electron configurations of Cu in intermediates and transition states at the Al-Cu<sup>II</sup>OH site of Cu-*cha*, Cu-*gme*, and Cu-*aft*.

| species                | <i>cha</i>                                                                                     | <i>gme</i>                                                                                     | <i>aft</i>                                                                                     |
|------------------------|------------------------------------------------------------------------------------------------|------------------------------------------------------------------------------------------------|------------------------------------------------------------------------------------------------|
| Al-Cu <sup>II</sup> OH | 4s <sup>0.38</sup> 3d <sup>9.36</sup> 4p <sup>0.23</sup> 4d <sup>0.01</sup>                    | 4s <sup>0.38</sup> 3d <sup>9.37</sup> 4p <sup>0.22</sup> 4d <sup>0.01</sup>                    | 4s <sup>0.39</sup> 3d <sup>9.36</sup> 4p <sup>0.22</sup> 4d <sup>0.01</sup>                    |
| INT1                   | 4s <sup>0.33</sup> 3d <sup>9.53</sup> 4p <sup>0.30</sup> 4d <sup>0.02</sup> 5p <sup>0.01</sup> | 4s <sup>0.34</sup> 3d <sup>9.53</sup> 4p <sup>0.28</sup> 4d <sup>0.02</sup> 5p <sup>0.01</sup> | 4s <sup>0.33</sup> 3d <sup>9.50</sup> 4p <sup>0.31</sup> 4d <sup>0.02</sup> 5p <sup>0.01</sup> |
| TS1                    | 4s <sup>0.31</sup> 3d <sup>9.72</sup> 4p <sup>0.24</sup> 4d <sup>0.02</sup> 5p <sup>0.01</sup> | 4s <sup>0.29</sup> 3d <sup>9.70</sup> 4p <sup>0.26</sup> 4d <sup>0.02</sup> 5p <sup>0.01</sup> | 4s <sup>0.32</sup> 3d <sup>9.72</sup> 4p <sup>0.24</sup> 4d <sup>0.02</sup> 5p <sup>0.01</sup> |
| INT2                   | 4s <sup>0.36</sup> 3d <sup>9.69</sup> 4p <sup>0.26</sup> 4d <sup>0.02</sup> 5p <sup>0.01</sup> | 4s <sup>0.35</sup> 3d <sup>9.70</sup> 4p <sup>0.25</sup> 4d <sup>0.02</sup> 5p <sup>0.01</sup> | 4s <sup>0.33</sup> 3d <sup>9.64</sup> 4p <sup>0.25</sup> 4d <sup>0.02</sup> 5p <sup>0.01</sup> |
| TS2                    | 4s <sup>0.35</sup> 3d <sup>9.49</sup> 4p <sup>0.34</sup> 4d <sup>0.01</sup>                    | 4s <sup>0.40</sup> 3d <sup>9.54</sup> 4p <sup>0.26</sup> 4d <sup>0.02</sup>                    | 4s <sup>0.33</sup> 3d <sup>9.41</sup> 4p <sup>0.40</sup> 4d <sup>0.02</sup> 5p <sup>0.01</sup> |
| INT3                   | 4s <sup>0.40</sup> 3d <sup>9.46</sup> 4p <sup>0.36</sup> 4d <sup>0.01</sup>                    | 4s <sup>0.40</sup> 3d <sup>9.50</sup> 4p <sup>0.29</sup> 4d <sup>0.01</sup> 5p <sup>0.01</sup> | 4s <sup>0.44</sup> 3d <sup>9.48</sup> 4p <sup>0.29</sup> 4d <sup>0.02</sup>                    |
| INT4                   | 4s <sup>0.38</sup> 3d <sup>9.43</sup> 4p <sup>0.37</sup> 4d <sup>0.01</sup>                    | 4s <sup>0.39</sup> 3d <sup>9.43</sup> 4p <sup>0.36</sup> 4d <sup>0.01</sup>                    | 4s <sup>0.39</sup> 3d <sup>9.41</sup> 4p <sup>0.36</sup> 4d <sup>0.01</sup>                    |
| TS3                    | 4s <sup>0.38</sup> 3d <sup>9.46</sup> 4p <sup>0.32</sup> 4d <sup>0.01</sup>                    | 4s <sup>0.38</sup> 3d <sup>9.47</sup> 4p <sup>0.33</sup> 4d <sup>0.01</sup>                    | 4s <sup>0.38</sup> 3d <sup>9.46</sup> 4p <sup>0.31</sup> 4d <sup>0.01</sup>                    |
| INT5                   | 4s <sup>0.37</sup> 3d <sup>9.71</sup> 4p <sup>0.18</sup> 4d <sup>0.01</sup>                    | 4s <sup>0.38</sup> 3d <sup>9.75</sup> 4p <sup>0.13</sup> 4d <sup>0.01</sup> 5p <sup>0.01</sup> | 4s <sup>0.32</sup> 3d <sup>9.70</sup> 4p <sup>0.18</sup> 4d <sup>0.01</sup>                    |
| TS4                    | 4s <sup>0.35</sup> 3d <sup>9.70</sup> 4p <sup>0.19</sup> 4d <sup>0.01</sup>                    | 4s <sup>0.30</sup> 3d <sup>9.61</sup> 4p <sup>0.21</sup> 4d <sup>0.01</sup>                    | 4s <sup>0.30</sup> 3d <sup>9.61</sup> 4p <sup>0.21</sup> 4d <sup>0.01</sup>                    |
| INT6                   | 4s <sup>0.33</sup> 3d <sup>9.68</sup> 4p <sup>0.20</sup> 5p <sup>0.01</sup>                    | 4s <sup>0.37</sup> 3d <sup>9.72</sup> 4p <sup>0.13</sup> 4d <sup>0.01</sup> 5p <sup>0.01</sup> | 4s <sup>0.36</sup> 3d <sup>9.71</sup> 4p <sup>0.14</sup> 4d <sup>0.01</sup>                    |
| TS5                    | 4s <sup>0.32</sup> 3d <sup>9.69</sup> 4p <sup>0.18</sup> 4d <sup>0.01</sup>                    | 4s <sup>0.33</sup> 3d <sup>9.70</sup> 4p <sup>0.15</sup> 4d <sup>0.01</sup> 5p <sup>0.01</sup> | 4s <sup>0.32</sup> 3d <sup>9.68</sup> 4p <sup>0.17</sup> 4d <sup>0.01</sup>                    |
| INT7                   | 4s <sup>0.27</sup> 3d <sup>9.73</sup> 4p <sup>0.30</sup> 4d <sup>0.01</sup>                    | 4s <sup>0.33</sup> 3d <sup>9.68</sup> 4p <sup>0.20</sup>                                       | 4s <sup>0.33</sup> 3d <sup>9.66</sup> 4p <sup>0.21</sup>                                       |
| INT8                   | 4s <sup>0.18</sup> 3d <sup>9.93</sup> 4p <sup>0.07</sup> 5p <sup>0.01</sup>                    | 4s <sup>0.19</sup> 3d <sup>9.92</sup> 4p <sup>0.07</sup> 5p <sup>0.01</sup>                    | 4s <sup>0.20</sup> 3d <sup>9.92</sup> 4p <sup>0.07</sup> 5p <sup>0.01</sup>                    |

**Table S6.** Natural electron configurations of Cu in intermediates and transition states at the 2Al-Cu<sup>II</sup> site of Cu-*cha*, Cu-*gme*, and Cu-*aft*.

| species              | <i>cha</i>                                                                                     | <i>gme</i>                                                                                     | <i>aft</i>                                                                                     |
|----------------------|------------------------------------------------------------------------------------------------|------------------------------------------------------------------------------------------------|------------------------------------------------------------------------------------------------|
| 2Al-Cu <sup>II</sup> | 4s <sup>0.29</sup> 3d <sup>9.30</sup> 4p <sup>0.21</sup> 4d <sup>0.01</sup> 5p <sup>0.01</sup> | 4s <sup>0.29</sup> 3d <sup>9.30</sup> 4p <sup>0.22</sup> 4d <sup>0.01</sup> 5p <sup>0.01</sup> | 4s <sup>0.30</sup> 3d <sup>9.30</sup> 4p <sup>0.23</sup> 4d <sup>0.01</sup> 5p <sup>0.01</sup> |
| INT1                 | 4s <sup>0.34</sup> 3d <sup>9.52</sup> 4p <sup>0.26</sup> 4d <sup>0.02</sup> 5p <sup>0.01</sup> | 4s <sup>0.33</sup> 3d <sup>9.51</sup> 4p <sup>0.27</sup> 4d <sup>0.02</sup> 5p <sup>0.01</sup> | 4s <sup>0.34</sup> 3d <sup>9.52</sup> 4p <sup>0.26</sup> 4d <sup>0.02</sup> 5p <sup>0.01</sup> |
| TS1                  | 4s <sup>0.27</sup> 3d <sup>9.60</sup> 4p <sup>0.26</sup> 4d <sup>0.02</sup> 5p <sup>0.01</sup> | 4s <sup>0.24</sup> 3d <sup>9.59</sup> 4p <sup>0.29</sup> 4d <sup>0.02</sup> 5p <sup>0.01</sup> | 4s <sup>0.24</sup> 3d <sup>9.62</sup> 4p <sup>0.28</sup> 4d <sup>0.02</sup> 5p <sup>0.01</sup> |
| INT2                 | 4s <sup>0.29</sup> 3d <sup>9.76</sup> 4p <sup>0.22</sup> 4d <sup>0.02</sup> 5p <sup>0.01</sup> | 4s <sup>0.28</sup> 3d <sup>9.76</sup> 4p <sup>0.23</sup> 4d <sup>0.02</sup> 5p <sup>0.01</sup> | 4s <sup>0.30</sup> 3d <sup>9.76</sup> 4p <sup>0.21</sup> 4d <sup>0.02</sup> 5p <sup>0.01</sup> |
| TS2                  | 4s <sup>0.28</sup> 3d <sup>9.73</sup> 4p <sup>0.21</sup> 4d <sup>0.02</sup> 5p <sup>0.01</sup> | 4s <sup>0.27</sup> 3d <sup>9.72</sup> 4p <sup>0.24</sup> 4d <sup>0.02</sup> 5p <sup>0.01</sup> | 4s <sup>0.26</sup> 3d <sup>9.74</sup> 4p <sup>0.21</sup> 4d <sup>0.02</sup> 5p <sup>0.01</sup> |
| INT3                 | 4s <sup>0.39</sup> 3d <sup>9.73</sup> 4p <sup>0.19</sup> 4d <sup>0.01</sup> 5p <sup>0.01</sup> | 4s <sup>0.34</sup> 3d <sup>9.73</sup> 4p <sup>0.22</sup> 4d <sup>0.02</sup> 5p <sup>0.01</sup> | 4s <sup>0.37</sup> 3d <sup>9.73</sup> 4p <sup>0.19</sup> 4d <sup>0.01</sup> 5p <sup>0.01</sup> |
| TS3                  | 4s <sup>0.25</sup> 3d <sup>9.60</sup> 4p <sup>0.26</sup> 4d <sup>0.02</sup> 5p <sup>0.01</sup> | 4s <sup>0.25</sup> 3d <sup>9.59</sup> 4p <sup>0.28</sup> 4d <sup>0.01</sup> 5p <sup>0.01</sup> | 4s <sup>0.24</sup> 3d <sup>9.60</sup> 4p <sup>0.27</sup> 4d <sup>0.02</sup> 5p <sup>0.01</sup> |
| INT4                 | 4s <sup>0.28</sup> 3d <sup>9.73</sup> 4p <sup>0.25</sup> 4d <sup>0.02</sup> 5p <sup>0.01</sup> | 4s <sup>0.27</sup> 3d <sup>9.71</sup> 4p <sup>0.27</sup> 4d <sup>0.02</sup> 5p <sup>0.01</sup> | 4s <sup>0.25</sup> 3d <sup>9.76</sup> 4p <sup>0.26</sup> 4d <sup>0.02</sup> 5p <sup>0.01</sup> |
| INT5                 | 4s <sup>0.33</sup> 3d <sup>9.84</sup> 4p <sup>0.17</sup> 4d <sup>0.01</sup> 5p <sup>0.01</sup> | 4s <sup>0.27</sup> 3d <sup>9.87</sup> 4p <sup>0.19</sup> 4d <sup>0.01</sup> 5p <sup>0.01</sup> | 4s <sup>0.32</sup> 3d <sup>9.85</sup> 4p <sup>0.17</sup> 4d <sup>0.01</sup> 5p <sup>0.01</sup> |

**Table S7.** Natural electron configurations of Cu in intermediates and transition states at the Al-Cu<sup>I</sup> site of Cu-*cha*, Cu-*gme*, and Cu-*aft*.

| species            | <i>cha</i>                                                                                     | <i>gme</i>                                                                                     | <i>aft</i>                                                                                     |
|--------------------|------------------------------------------------------------------------------------------------|------------------------------------------------------------------------------------------------|------------------------------------------------------------------------------------------------|
| Al-Cu <sup>I</sup> | 4s <sup>0.27</sup> 3d <sup>9.87</sup> 4p <sup>0.16</sup> 4d <sup>0.01</sup> 5p <sup>0.01</sup> | 4s <sup>0.27</sup> 3d <sup>9.87</sup> 4p <sup>0.17</sup> 4d <sup>0.01</sup> 5p <sup>0.01</sup> | 4s <sup>0.27</sup> 3d <sup>9.86</sup> 4p <sup>0.17</sup> 4d <sup>0.01</sup> 5p <sup>0.01</sup> |
| INT1               | 4s <sup>0.34</sup> 3d <sup>9.54</sup> 4p <sup>0.27</sup> 4d <sup>0.01</sup> 5p <sup>0.01</sup> | 4s <sup>0.34</sup> 3d <sup>9.54</sup> 4p <sup>0.27</sup> 4d <sup>0.02</sup> 5p <sup>0.01</sup> | 4s <sup>0.35</sup> 3d <sup>9.54</sup> 4p <sup>0.26</sup> 4d <sup>0.02</sup> 5p <sup>0.01</sup> |
| TS1                | 4s <sup>0.32</sup> 3d <sup>9.64</sup> 4p <sup>0.21</sup> 4d <sup>0.01</sup> 5p <sup>0.01</sup> | 4s <sup>0.35</sup> 3d <sup>9.39</sup> 4p <sup>0.27</sup> 4d <sup>0.01</sup> 5p <sup>0.01</sup> | 4s <sup>0.35</sup> 3d <sup>9.39</sup> 4p <sup>0.27</sup> 4d <sup>0.01</sup> 5p <sup>0.01</sup> |
| INT2               | 4s <sup>0.37</sup> 3d <sup>9.31</sup> 4p <sup>0.30</sup> 4d <sup>0.01</sup> 5p <sup>0.01</sup> | 4s <sup>0.36</sup> 3d <sup>9.31</sup> 4p <sup>0.30</sup> 4d <sup>0.01</sup> 5p <sup>0.01</sup> | 4s <sup>0.37</sup> 3d <sup>9.31</sup> 4p <sup>0.29</sup> 4d <sup>0.01</sup> 5p <sup>0.01</sup> |
| TS2                | 4s <sup>0.36</sup> 3d <sup>9.38</sup> 4p <sup>0.34</sup> 4d <sup>0.01</sup> 5p <sup>0.01</sup> | 4s <sup>0.35</sup> 3d <sup>9.38</sup> 4p <sup>0.34</sup> 4d <sup>0.01</sup> 5p <sup>0.01</sup> | 4s <sup>0.37</sup> 3d <sup>9.38</sup> 4p <sup>0.32</sup> 4d <sup>0.01</sup> 5p <sup>0.01</sup> |
| INT3               | 4s <sup>0.32</sup> 3d <sup>9.34</sup> 4p <sup>0.26</sup> 4d <sup>0.01</sup> 5p <sup>0.01</sup> | 4s <sup>0.32</sup> 3d <sup>9.34</sup> 4p <sup>0.26</sup> 4d <sup>0.01</sup> 5p <sup>0.01</sup> | 4s <sup>0.33</sup> 3d <sup>9.34</sup> 4p <sup>0.24</sup> 4d <sup>0.01</sup> 5p <sup>0.01</sup> |
| INT4               | 4s <sup>0.34</sup> 3d <sup>9.44</sup> 4p <sup>0.33</sup> 4d <sup>0.02</sup> 5p <sup>0.01</sup> | 4s <sup>0.34</sup> 3d <sup>9.45</sup> 4p <sup>0.32</sup> 4d <sup>0.02</sup> 5p <sup>0.01</sup> | 4s <sup>0.34</sup> 3d <sup>9.44</sup> 4p <sup>0.33</sup> 4d <sup>0.02</sup> 5p <sup>0.01</sup> |
| TS3                | 4s <sup>0.31</sup> 3d <sup>9.69</sup> 4p <sup>0.21</sup> 4d <sup>0.02</sup> 5p <sup>0.01</sup> | 4s <sup>0.32</sup> 3d <sup>9.69</sup> 4p <sup>0.20</sup> 4d <sup>0.01</sup> 5p <sup>0.01</sup> | 4s <sup>0.32</sup> 3d <sup>9.70</sup> 4p <sup>0.18</sup> 4d <sup>0.01</sup> 5p <sup>0.01</sup> |
| INT5               | 4s <sup>0.28</sup> 3d <sup>9.67</sup> 4p <sup>0.19</sup> 4d <sup>0.01</sup> 5p <sup>0.01</sup> | 4s <sup>0.28</sup> 3d <sup>9.66</sup> 4p <sup>0.21</sup> 4d <sup>0.01</sup> 5p <sup>0.01</sup> | 4s <sup>0.31</sup> 3d <sup>9.63</sup> 4p <sup>0.20</sup> 4d <sup>0.01</sup> 5p <sup>0.01</sup> |
| INT6               | 4s <sup>0.38</sup> 3d <sup>9.31</sup> 4p <sup>0.26</sup> 5p <sup>0.01</sup>                    | 4s <sup>0.38</sup> 3d <sup>9.31</sup> 4p <sup>0.26</sup> 5p <sup>0.01</sup>                    | 4s <sup>0.39</sup> 3d <sup>9.31</sup> 4p <sup>0.25</sup> 5p <sup>0.01</sup>                    |
| INT7               | 4s <sup>0.32</sup> 3d <sup>9.42</sup> 4p <sup>0.28</sup> 4d <sup>0.02</sup> 5p <sup>0.01</sup> | 4s <sup>0.31</sup> 3d <sup>9.42</sup> 4p <sup>0.28</sup> 4d <sup>0.02</sup> 5p <sup>0.01</sup> | 4s <sup>0.34</sup> 3d <sup>9.43</sup> 4p <sup>0.23</sup> 4d <sup>0.02</sup> 5p <sup>0.01</sup> |
| INT8               | 4s <sup>0.38</sup> 3d <sup>9.36</sup> 4p <sup>0.23</sup> 4d <sup>0.01</sup> 5p <sup>0.01</sup> | 4s <sup>0.37</sup> 3d <sup>9.36</sup> 4p <sup>0.23</sup> 4d <sup>0.01</sup> 5p <sup>0.01</sup> | 4s <sup>0.37</sup> 3d <sup>9.36</sup> 4p <sup>0.24</sup> 4d <sup>0.01</sup> 5p <sup>0.01</sup> |

**Table S8.** Natural electron configurations of Cu in intermediates and transition states at the 2AlH-Cu<sup>I</sup> site of Cu-*cha*, Cu-*gme*, and Cu-*aft*.

| species              | <i>cha</i>                                                                                      | <i>gme</i>                                                                                     | <i>aft</i>                                                                                     |
|----------------------|-------------------------------------------------------------------------------------------------|------------------------------------------------------------------------------------------------|------------------------------------------------------------------------------------------------|
| 2AlH-Cu <sup>I</sup> | 4s <sup>0.34</sup> 3d <sup>9.83</sup> 4p <sup>0.16</sup> 4d <sup>0.01</sup> 5p <sup>0.01</sup>  | 4s <sup>0.33</sup> 3d <sup>9.83</sup> 4p <sup>0.16</sup> 4d <sup>0.01</sup> 5p <sup>0.01</sup> | 4s <sup>0.35</sup> 3d <sup>9.82</sup> 4p <sup>0.16</sup> 4d <sup>0.01</sup> 5p <sup>0.01</sup> |
| INT1                 | 4s <sup>0.33</sup> 3d <sup>9.54</sup> 4p <sup>0.29</sup> 4d <sup>0.02</sup> 5p <sup>0.01</sup>  | 4s <sup>0.32</sup> 3d <sup>9.54</sup> 4p <sup>0.29</sup> 4d <sup>0.02</sup> 5p <sup>0.01</sup> | 4s <sup>0.33</sup> 3d <sup>9.53</sup> 4p <sup>0.29</sup> 4d <sup>0.02</sup> 5p <sup>0.01</sup> |
| TS1                  | 4s <sup>0.34</sup> 3d <sup>9.39</sup> 4p <sup>0.30</sup> 4d <sup>0.02</sup> 5p <sup>0.01</sup>  | 4s <sup>0.34</sup> 3d <sup>9.38</sup> 4p <sup>0.29</sup> 4d <sup>0.02</sup> 5p <sup>0.01</sup> | 4s <sup>0.34</sup> 3d <sup>9.33</sup> 4p <sup>0.33</sup> 4d <sup>0.01</sup> 5p <sup>0.01</sup> |
| INT2                 | 4s <sup>0.35</sup> 3d <sup>9.34</sup> 4p <sup>0.39</sup> 4d <sup>0.01</sup> 5p <sup>0.01</sup>  | 4s <sup>0.35</sup> 3d <sup>9.34</sup> 4p <sup>0.38</sup> 4d <sup>0.01</sup> 5p <sup>0.01</sup> | 4s <sup>0.36</sup> 3d <sup>9.34</sup> 4p <sup>0.38</sup> 4d <sup>0.01</sup> 5p <sup>0.01</sup> |
| TS2                  | 4s <sup>0.35</sup> 3d <sup>9.34</sup> 4p <sup>0.35</sup> 4d <sup>0.01</sup> 5p <sup>0.01</sup>  | 4s <sup>0.34</sup> 3d <sup>9.34</sup> 4p <sup>0.35</sup> 4d <sup>0.02</sup> 5p <sup>0.01</sup> | 4s <sup>0.36</sup> 3d <sup>9.35</sup> 4p <sup>0.33</sup> 4d <sup>0.01</sup> 5p <sup>0.01</sup> |
| INT3                 | 4s <sup>0.30</sup> 3d <sup>9.32</sup> 4p <sup>0.29</sup> 4d <sup>0.01</sup> 5p <sup>0.01</sup>  | 4s <sup>0.29</sup> 3d <sup>9.32</sup> 4p <sup>0.29</sup> 4d <sup>0.01</sup> 5p <sup>0.01</sup> | 4s <sup>0.29</sup> 3d <sup>9.32</sup> 4p <sup>0.30</sup> 4d <sup>0.01</sup> 5p <sup>0.01</sup> |
| INT4                 | 4s <sup>0.33</sup> 3d <sup>9.45</sup> 4p <sup>0.30</sup> 4d <sup>0.02</sup> 5p <sup>0.01</sup>  | 4s <sup>0.33</sup> 3d <sup>9.45</sup> 4p <sup>0.30</sup> 4d <sup>0.02</sup> 5p <sup>0.01</sup> | 4s <sup>0.33</sup> 3d <sup>9.45</sup> 4p <sup>0.31</sup> 4d <sup>0.02</sup> 5p <sup>0.01</sup> |
| TS3                  | 4s <sup>0.27</sup> 3d <sup>9.65</sup> 4p <sup>0.27</sup> 4d <sup>0.025</sup> 6s <sup>0.01</sup> | 4s <sup>0.31</sup> 3d <sup>9.69</sup> 4p <sup>0.20</sup> 4d <sup>0.01</sup> 5p <sup>0.01</sup> | 4s <sup>0.30</sup> 3d <sup>9.66</sup> 4p <sup>0.21</sup> 4d <sup>0.01</sup> 5p <sup>0.01</sup> |
| INT5                 | 4s <sup>0.26</sup> 3d <sup>9.66</sup> 4p <sup>0.25</sup> 4d <sup>0.02</sup> 5p <sup>0.01</sup>  | 4s <sup>0.27</sup> 3d <sup>9.65</sup> 4p <sup>0.26</sup> 4d <sup>0.02</sup> 5p <sup>0.01</sup> | 4s <sup>0.25</sup> 3d <sup>9.66</sup> 4p <sup>0.25</sup> 4d <sup>0.02</sup> 5p <sup>0.01</sup> |
| INT6                 | 4s <sup>0.33</sup> 3d <sup>9.31</sup> 4p <sup>0.31</sup> 4d <sup>0.01</sup> 5p <sup>0.01</sup>  | 4s <sup>0.34</sup> 3d <sup>9.29</sup> 4p <sup>0.31</sup> 4d <sup>0.01</sup> 5p <sup>0.01</sup> | 4s <sup>0.34</sup> 3d <sup>9.29</sup> 4p <sup>0.32</sup> 4d <sup>0.01</sup> 5p <sup>0.01</sup> |
| INT7                 | 4s <sup>0.34</sup> 3d <sup>9.29</sup> 4p <sup>0.32</sup> 4d <sup>0.01</sup> 5p <sup>0.01</sup>  | 4s <sup>0.33</sup> 3d <sup>9.32</sup> 4p <sup>0.30</sup> 4d <sup>0.01</sup> 5p <sup>0.01</sup> | 4s <sup>0.33</sup> 3d <sup>9.28</sup> 4p <sup>0.32</sup> 4d <sup>0.01</sup> 5p <sup>0.01</sup> |
| INT8                 | 4s <sup>0.38</sup> 3d <sup>9.36</sup> 4p <sup>0.23</sup> 4d <sup>0.01</sup> 5p <sup>0.01</sup>  | 4s <sup>0.29</sup> 3d <sup>9.30</sup> 4p <sup>0.22</sup> 4d <sup>0.01</sup> 5p <sup>0.01</sup> | 4s <sup>0.30</sup> 3d <sup>9.30</sup> 4p <sup>0.23</sup> 4d <sup>0.01</sup> 5p <sup>0.01</sup> |

**Table S9.** Natural electron configurations of Cu in intermediates and transition states at the  $[\text{Cu}^{\text{II}}(\text{NH}_3)_4]^{2+}$  site of Cu<sup>II</sup>-2Al-*cha*, -*gme*, and *aft*.

| species              | <i>cha</i>                                                                                     | <i>gme</i>                                                                                     | <i>aft</i>                                                                                     |
|----------------------|------------------------------------------------------------------------------------------------|------------------------------------------------------------------------------------------------|------------------------------------------------------------------------------------------------|
| 2Al-Cu <sup>II</sup> | 4s <sup>0.37</sup> 3d <sup>9.34</sup> 4p <sup>0.28</sup> 4d <sup>0.03</sup>                    | 4s <sup>0.39</sup> 3d <sup>9.35</sup> 4p <sup>0.19</sup> 4d <sup>0.03</sup> 5p <sup>0.01</sup> | 4s <sup>0.37</sup> 3d <sup>9.34</sup> 4p <sup>0.27</sup> 4d <sup>0.02</sup>                    |
| INT1                 | 4s <sup>0.38</sup> 3d <sup>9.33</sup> 4p <sup>0.30</sup> 4d <sup>0.03</sup> 5p <sup>0.01</sup> | 4s <sup>0.38</sup> 3d <sup>9.34</sup> 4p <sup>0.26</sup> 4d <sup>0.03</sup> 5p <sup>0.01</sup> | 4s <sup>0.37</sup> 3d <sup>9.33</sup> 4p <sup>0.28</sup> 4d <sup>0.03</sup> 5p <sup>0.01</sup> |
| TS                   | 4s <sup>0.39</sup> 3d <sup>9.59</sup> 4p <sup>0.21</sup> 4d <sup>0.02</sup> 5p <sup>0.01</sup> | 4s <sup>0.37</sup> 3d <sup>9.65</sup> 4p <sup>0.19</sup> 4d <sup>0.02</sup> 5p <sup>0.01</sup> | 4s <sup>0.37</sup> 3d <sup>9.61</sup> 4p <sup>0.23</sup> 4d <sup>0.02</sup> 5p <sup>0.01</sup> |
| INT2                 | 4s <sup>0.51</sup> 3d <sup>9.74</sup> 4p <sup>0.16</sup> 4d <sup>0.02</sup> 5p <sup>0.01</sup> | 4s <sup>0.49</sup> 3d <sup>9.75</sup> 4p <sup>0.17</sup> 4d <sup>0.01</sup> 5p <sup>0.01</sup> | 4s <sup>0.48</sup> 3d <sup>9.76</sup> 4p <sup>0.17</sup> 4d <sup>0.02</sup> 5p <sup>0.01</sup> |

**Table S10.** Natural electron configurations of Cu in intermediates and transition states at the 2Al-2Cu<sup>I</sup> site of Cu-*cha*, Cu-*gme*, and Cu-*aft*.

| species | <i>cha</i>                                                                                     | <i>gme</i>                                                                                     | <i>aft</i>                                                                                     |
|---------|------------------------------------------------------------------------------------------------|------------------------------------------------------------------------------------------------|------------------------------------------------------------------------------------------------|
| INT1    | 4s <sup>0.50</sup> 3d <sup>9.77</sup> 4p <sup>0.13</sup> 4d <sup>0.02</sup> 5p <sup>0.01</sup> | 4s <sup>0.51</sup> 3d <sup>9.77</sup> 4p <sup>0.15</sup> 4d <sup>0.02</sup> 5p <sup>0.01</sup> | 4s <sup>0.52</sup> 3d <sup>9.78</sup> 4p <sup>0.13</sup> 4d <sup>0.02</sup> 5p <sup>0.01</sup> |
|         | 4s <sup>0.55</sup> 3d <sup>9.77</sup> 4p <sup>0.13</sup> 4d <sup>0.01</sup> 5p <sup>0.01</sup> | 4s <sup>0.53</sup> 3d <sup>9.77</sup> 4p <sup>0.18</sup> 4d <sup>0.02</sup> 5p <sup>0.01</sup> | 4s <sup>0.50</sup> 3d <sup>9.78</sup> 4p <sup>0.13</sup> 4d <sup>0.02</sup> 5p <sup>0.01</sup> |
| INT2    | 4s <sup>0.36</sup> 3d <sup>9.56</sup> 4p <sup>0.22</sup> 4d <sup>0.02</sup> 5p <sup>0.01</sup> | 4s <sup>0.39</sup> 3d <sup>9.57</sup> 4p <sup>0.18</sup> 4d <sup>0.02</sup> 5p <sup>0.01</sup> | 4s <sup>0.33</sup> 3d <sup>9.53</sup> 4p <sup>0.21</sup> 4d <sup>0.02</sup> 5p <sup>0.01</sup> |
|         | 4s <sup>0.29</sup> 3d <sup>9.58</sup> 4p <sup>0.24</sup> 4d <sup>0.02</sup> 5p <sup>0.01</sup> | 4s <sup>0.40</sup> 3d <sup>9.60</sup> 4p <sup>0.23</sup> 4d <sup>0.02</sup> 5p <sup>0.01</sup> | 4s <sup>0.31</sup> 3d <sup>9.50</sup> 4p <sup>0.21</sup> 4d <sup>0.02</sup> 5p <sup>0.01</sup> |
| INT3    | 4s <sup>0.30</sup> 3d <sup>9.48</sup> 4p <sup>0.31</sup> 4d <sup>0.02</sup>                    | 4s <sup>0.32</sup> 3d <sup>9.48</sup> 4p <sup>0.19</sup> 4d <sup>0.02</sup> 5p <sup>0.01</sup> | 4s <sup>0.30</sup> 3d <sup>9.48</sup> 4p <sup>0.30</sup> 4d <sup>0.02</sup>                    |
|         | 4s <sup>0.30</sup> 3d <sup>9.48</sup> 4p <sup>0.31</sup> 4d <sup>0.02</sup>                    | 4s <sup>0.32</sup> 3d <sup>9.48</sup> 4p <sup>0.20</sup> 4d <sup>0.02</sup> 5p <sup>0.01</sup> | 4s <sup>0.30</sup> 3d <sup>9.48</sup> 4p <sup>0.30</sup> 4d <sup>0.02</sup>                    |
| TS      | 4s <sup>0.34</sup> 3d <sup>9.35</sup> 4p <sup>0.37</sup> 4d <sup>0.02</sup>                    | 4s <sup>0.35</sup> 3d <sup>9.37</sup> 4p <sup>0.24</sup> 4d <sup>0.02</sup> 5p <sup>0.01</sup> | 4s <sup>0.34</sup> 3d <sup>9.35</sup> 4p <sup>0.37</sup> 4d <sup>0.02</sup>                    |
|         | 4s <sup>0.34</sup> 3d <sup>9.35</sup> 4p <sup>0.37</sup> 4d <sup>0.02</sup>                    | 4s <sup>0.35</sup> 3d <sup>9.37</sup> 4p <sup>0.23</sup> 4d <sup>0.02</sup> 5p <sup>0.01</sup> | 4s <sup>0.34</sup> 3d <sup>9.35</sup> 4p <sup>0.37</sup> 4d <sup>0.02</sup>                    |
| INT4    | 4s <sup>0.39</sup> 3d <sup>9.24</sup> 4p <sup>0.41</sup> 4d <sup>0.01</sup>                    | 4s <sup>0.39</sup> 3d <sup>9.24</sup> 4p <sup>0.37</sup> 4d <sup>0.01</sup> 5p <sup>0.01</sup> | 4s <sup>0.37</sup> 3d <sup>9.23</sup> 4p <sup>0.43</sup> 4d <sup>0.01</sup>                    |
|         | 4s <sup>0.39</sup> 3d <sup>9.24</sup> 4p <sup>0.40</sup> 4d <sup>0.01</sup>                    | 4s <sup>0.38</sup> 3d <sup>9.24</sup> 4p <sup>0.37</sup> 4d <sup>0.01</sup> 5p <sup>0.01</sup> | 4s <sup>0.37</sup> 3d <sup>9.23</sup> 4p <sup>0.43</sup> 4d <sup>0.01</sup>                    |



## XVII. NPA charge of Cu in Cu-*cha*, Cu-*gme*, and Cu-*aft*.

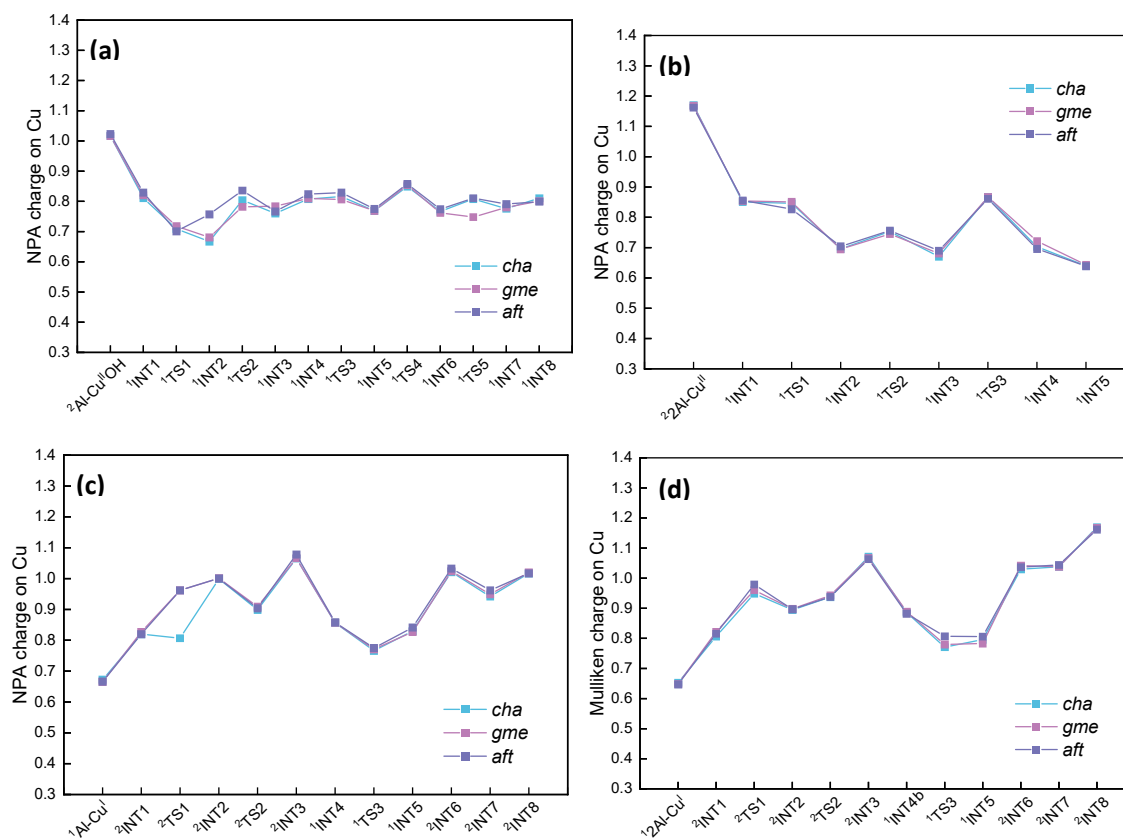

**Figure S11.** Natural population analysis (NPA) charge on the Cu ions of intermediates and transition states during the reduction (a, b) and oxidation (c, d) processes. (a, c) show the processes on the Al site, and (b, d) show the processes on the 2Al site. The superscript numbers along the horizontal axes represent the spin multiplicity of the ground state.

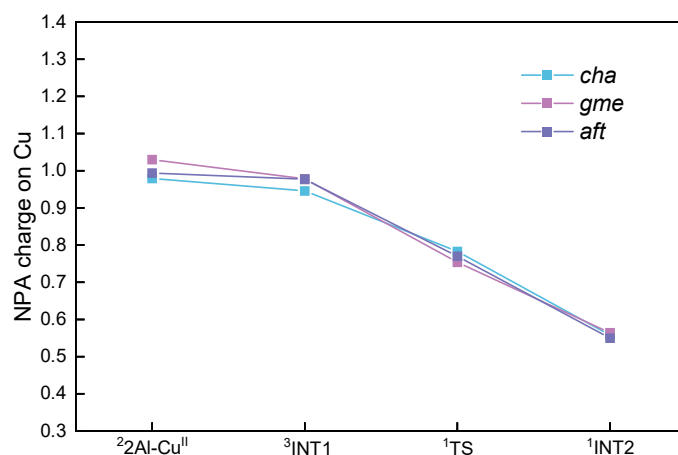

**Figure S12.** NPA charge on the Cu ions of intermediates and transition states during reduction at the  $[\text{Cu}^{\text{II}}(\text{NH}_3)_4]^{2+}$  site of  $\text{Cu}^{\text{II}}\text{-2Al-cha}$ ,  $\text{-gme}$ , and  $\text{-aft}$ . The superscript numbers along the horizontal axes represent the spin multiplicity of the ground state.

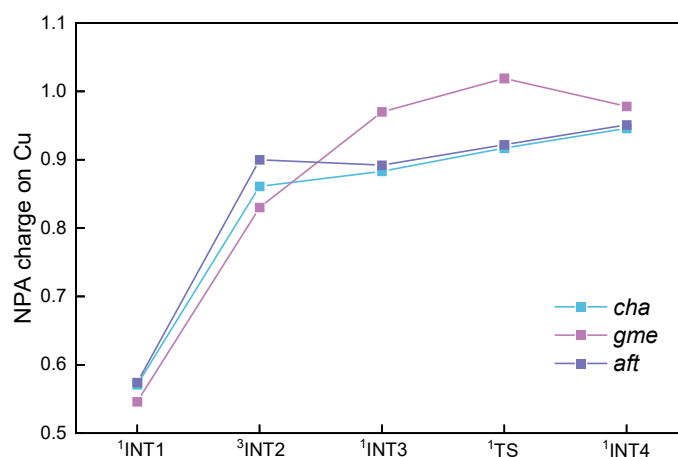

**Figure S13.** NPA charge on the Cu ions of intermediates and transition states during reduction at the  $2\text{Al-2Cu}^{\text{I}}$  site of  $\text{Cu-cha}$ ,  $\text{Cu-gme}$ , and  $\text{Cu-aft}$ . The superscript numbers along the horizontal axes represent the spin multiplicity of the ground state.
